# Supplementary material for: Neural basis of cognitive control signals in anterior cingulate cortex during delay discounting
Source: PubMed Central journal article supplement — bioRxiv. 2025 Jun 11:2024.06.07.597894. Originally published 2024 Jun 8. Preprint. [Version 2] doi: 10.1101/2024.06.07.597894 (PMC11185781; doi:10.1101/2024.06.07.597894), 2025-06-11
Supplement: NIHPP2024.06.07.597894V1-supplement-1.pdf [file NIHPP2024.06.07.597894V1-supplement-1.pdf]

## Supplemental Figure

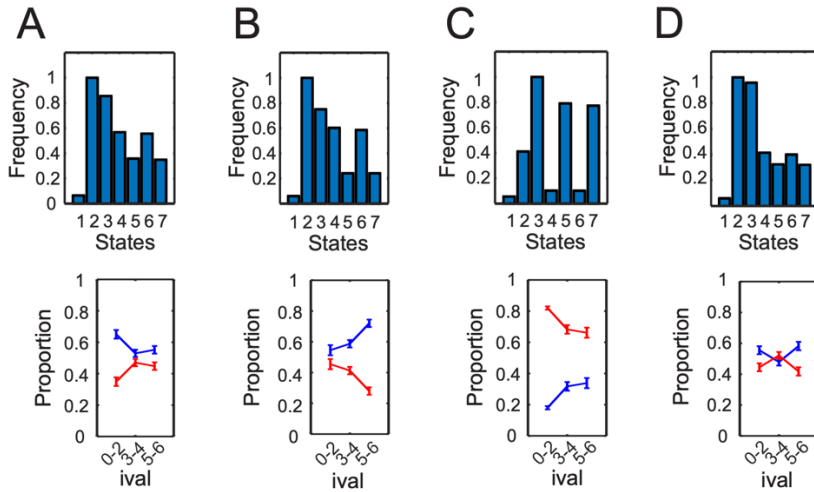

**Figure S1:** Modeling approaches for G2. A)  $\alpha=0.2$ ,  $\epsilon$ -greedy=0.8, no dbias. B)  $\alpha=0.5$ ,  $\epsilon$ -greedy=0.5, no dbias. C)  $\alpha=0.97$ ,  $\epsilon$ -greedy=0.4, uniform dbias=1. D)  $\alpha=0.2$ ,  $\epsilon$ -greedy=0.8, uniform dbias=0.5. In each subpanel, the state frequency distribution (top) and choice distribution with respect to ival (bottom) are plotted as in Figure 2.
